# Supplementary material for: Non-relapse mortality after CAR T-cell therapy: A systematic review and meta-analysis of 7,788 lymphoma and myeloma patients
Source: Research Square preprint supplement (doi:10.21203/rs.3.rs-3907430/v1), 2024-02-01
Supplement: Supplementary file 1 [file 30042f9c07220d8b8e4ee109.docx]

**Table S1.** Joanna-Brigg’s Institute assessment of study bias.

| **Author** | **Year** | **Criterion 1: Inclusion criteria** | **Criterion 2: measurement of mortality/ causes of death** | **Criterion 3: identification of mortality/ causes of death** | **Criterion 4: Consecutive Inclusion** | **Criterion 5: Complete Inclusion** | **Criterion 6: demographics** | **Criterion 7: Clinical information** | **Criterion 8: Follow-Up results** |
| --- | --- | --- | --- | --- | --- | --- | --- | --- | --- |
| Fowler et al. | 2022 | Yes | Yes/Yes | Yes/Yes | Yes | Yes | Yes | Yes | Yes |
| Jacobson et al. | 2022A | Yes | Yes/Yes | Yes/Yes | Yes | Yes | Yes | Yes | Yes |
| Abramson et al. | 2020 | Yes | Yes/Yes | Yes/Yes | Yes | Yes | Yes | Yes | Yes |
| Bishop et al. | 2022 | Yes | Yes/Yes | Yes/Yes | Yes | Yes | Yes | Yes | Yes |
| Kamdar et al. | 2022 | Yes | Yes/Yes | Yes/Yes | Yes | Yes | Yes | Yes | Yes |
| Neelapu et al. | 2022 | Yes | Yes/Yes | Yes/Yes | Yes | Yes | Yes | Yes | Yes |
| Neelapu et al. | 2023 | Yes | Yes/Yes | Yes/Yes | Yes | Yes | Yes | Yes | Yes |
| Sehgal et al. | 2022 | Yes | Yes/Yes | Yes/Yes | Yes | Yes | Yes | Yes | Yes |
| Westin et al. | 2023 | Yes | Yes/Yes | Yes/Yes | Yes | Yes | Yes | Yes | Yes |
| Lin et al. | 2023 | Yes | Yes/Yes | Yes/No | Yes | Yes | Yes | Yes | Yes |
| Martin et al. | 2023 | Yes | Yes/Yes | Yes/Yes | Yes | Yes | Yes | Yes | Yes |
| Mi et al. | 2022 | Yes | Yes/Yes | Yes/Yes | Yes | Yes | Yes | Yes | Yes |
| Munshi et al. | 2021 | Yes | Yes/Yes | Yes/No | Yes | Yes | Yes | Yes | Yes |
| Rodriguez-Otero et al. | 2023 | Yes | Yes/Yes | Yes/Yes | Yes | Yes | Yes | Yes | Yes |
| San-Miguel et al. | 2023 | Yes | Yes/Yes | Yes/No | Yes | Yes | Yes | Yes | Yes |
| Wang et al. | 2023A | Yes | Yes/Yes | Yes/Yes | Yes | Yes | Yes | Yes | Yes |
| Bethge et al. | 2022 | Yes | Yes/Yes | Yes/Yes | No | No | Yes | Yes | Yes |
| Dores et al. | 2021 | Yes | Yes/Yes | Yes/Yes | Yes | Yes | Yes | No | No |
| Jacobson et al. | 2022B | Yes | Yes/Yes | Yes/Yes | No | No | Yes | Yes | Yes |
| Kuhnl et al. | 2022 | Yes | Yes/Yes | Yes/Yes | Yes | Yes | Yes | Yes | Yes |
| Kwon et al. | 2023 | Yes | Yes/Yes | Yes/Yes | Yes | Yes | Yes | Yes | Yes |
| Lemoine et al. | 2023 | Yes | Yes/Yes | Yes/Yes | Yes | Yes | Yes | Yes | Yes |
| Logue et al. | 2021 | Yes | Yes/Yes | Yes/Yes | No | Yes | Yes | Yes | Yes |
| Nastoupil et al. | 2020 | Yes | Yes/Yes | Yes/Yes | Yes | Yes | Yes | Yes | Yes |
| Pinnix et al. | 2020 | Yes | Yes/Yes | Yes/Yes | No | Yes | Yes | Yes | Yes |
| Rejeski et al. | 2022 | Yes | Yes/Yes | Yes/Yes | No | Yes | Yes | Yes | Yes |
| Kwon et al. | 2023 | Yes | Yes/Yes | Yes/Yes | Yes | Yes | Yes | Yes | Yes |
| Riedell et al. | 2022 | Yes | Yes/Yes | Yes/Yes | Yes | Yes | Yes | Yes | Yes |
| Lemoine et al. | 2023 | Yes | Yes/Yes | Yes/Yes | Yes | Yes | Yes | Yes | Yes |
| Spanjaart et al. | 2023 | Yes | Yes/Yes | Yes/Yes | Yes | Yes | Yes | Yes | Yes |
| Strati et al. | 2020 | Yes | Yes/Yes | Yes/Yes | Yes | Yes | Yes | Yes | Yes |
| Ferreri et al. & Hansen et al. | 2023 | Yes | Yes/Yes | Yes/Yes | Yes | Yes | Yes | Yes | Yes |
| Rejeski et al. | 2023A | Yes | Yes/Yes | Yes/Yes | Yes | Yes | Yes | Yes | Yes |
| Rejeski et al. | 2023B | Yes | Yes/Yes | Yes/Yes | Yes | Yes | Yes | Yes | Yes |
| Wang et al. | 2023B | Yes | Yes/Yes | Yes/Yes | Yes | Yes | Yes | Yes | Yes |
| Nydegger et al. | 2022 | Yes | Yes/Yes | Yes/Yes | Yes | Yes | Yes | Yes | Yes |
| Schaefer et al. | 2021 | Yes | Yes/Yes | Yes/Yes | Yes | Yes | Yes | Yes | Yes |
| Casadei et al. | 2022 | Yes | Yes/Yes | Yes/Yes | Yes | Yes | Yes | Yes | Yes |
| Thakkar et al. | 2022 | Yes | Yes/Yes | Yes/Yes | No | No | Yes | Yes | Yes |
| Forero-Forero et al. | 2023 | Yes | Yes/Yes | Yes/No | No | No | Yes | Yes | Yes |
| Lamure et al. | 2021 | Yes | Yes/Yes | Yes/Yes | Yes | Yes | Yes | Yes | Yes |
| Ghafouri et al. | 2021 | Yes | Yes/Yes | Yes/Yes | Yes | Yes | Yes | Yes | Yes |
| Wudhikarn et al. | 2021 | Yes | Yes/Yes | Yes/No | Yes | Yes | Yes | Yes | Yes |
| Baird et al. | 2021 | Yes | Yes/Yes | Yes/Yes | Yes | Yes | Yes | Yes | Yes |
| Grana et al. | 2021 | Yes | Yes/Yes | Yes/Yes | No | No | Yes | Yes | Yes |
| Iacoboni et al. | 2022 | Yes | Yes/Yes | Yes/Yes | Yes | Yes | Yes | Yes | Yes |
| Logue et al. | 2022 | Yes | Yes/Yes | Yes/Yes | No | No | Yes | Yes | Yes |
| Georgi et al. | 2023 | Yes | Yes/Yes | Yes/Yes | No | No | Yes | Yes | Yes |
| Iovino et al. | 2022 | Yes | Yes/Yes | Yes/No | Yes | Yes | Yes | Yes | Yes |
| Wudhikarn et al. | 2023 | Yes | Yes/Yes | Yes/Yes | No | No | Yes | Yes | Yes |

Joanna-Brigg’s Institute assessment of study bias (Munn et al. JBI Evid Synth. 2020 Oct;18(10):2127-2133). Criterion 9 (presenting sites’/clinics’ demographics) was assessed within criterion 5 (demographics of the participants in the study). Criterion 10 (statistical analysis) was not applicable since the extracted data processed in this metaanalysis are not based on statistical tools in the original studies.

| **Table S2.** Causes of death classified as "others". | | |
| --- | --- | --- |
| **Case** | **Study cohort** | **Cause of death** |
| 1 | Bishop_2022 | Hepatic failure |
| 2 | Bishop_2022 | Euthanasia |
| 3 | Bishop_2022 | General Disorders and administration site conditions - Death |
| 4 | Dores_2021 | General Disorders and administration site conditions - Death |
| 5 | Fowler_2022 | General Disorders and administration site conditions - Death |
| 6 | Iacoboni_2022 | Clinical deterioration in the context of prolonged steroid therapy |
| 7 | Jacobson_2022_B | Light chain disease |
| 8 | Jacobson_2022_B | Persistent Pancytopenia |
| 9 | Kamdar_2022 | "Failure to thrive after disease progression" |
| 10 | Kuhnl_2022_B | Bowel Perforation |
| 11 | Kuhnl_2022_B | Bowel Perforation |
| 12 | Lemoine_2023 | Sudden death |
| 13 | Lemoine_2023 | Sudden death |
| 14 | Lemoine_2023 | Sudden death |
| 15 | Lemoine_2023 | Anasarca |
| 16 | Martin_2023 | Ascites |
| 17 | Mi_2022 | Hepatic failure |
| 18 | Neelapu_2023 | Complications of allogeneic transplantation for previous treatment–related MDS not related to axi-cel |
| 19 | Rejeski_2022_A | Accident |
| 20 | Rejeski_2023_B | General deconditioning |
| 21 | Rodriguez-Otero_2023 | Amyotrophic lateral sclerosis |
| 22 | Westin_2023 | Euthanasia |

**Table S3.** Distribution of secondary malignancies.

|  | **MDS/AML**  **(n = 16)** | **Carcinoma**  **(n = 6)** | **Sarcoma**  **(n = 1)** | **Prior/secondary malignancy, NOS (n = 15)** |
| --- | --- | --- | --- | --- |
| **Entity** |  |  |  |  |
| - LBCL | 9 (56.25) | 4 (66.7) | 0 (0) | 14 (93.3) |
| - IL | 0 (0) | 0 (0) | 0 (0) | 1 (6.7) |
| - MCL | 2 (12.5) | 0 (0) | 1 (100) | 0 (0) |
| - MM | 5 (31.25) | 2 (33.3) | 0 (0) | 0 (0) |
| **Product** |  |  |  |  |
| - Axi-cel | 3 (18.75) | 2 (33.3) | 0 (0) | 14 (93.3) |
| - Tisa-cel | 1 (6.25) | 1 (16.7) | 0 (0) | 1 (6.7) |
| - Tisa-cel or axi-cel | 5 (31.25) | 1 (16.7) | 0 (0) | 0 (0) |
| - Liso-cel | 0 (0) | 0 (0) | 0 (0) | 0 (0) |
| - Brexu-cel | 2 (12.5) | 1 (16.7) | 1 (100) | 0 (0) |
| - Ide-cel | 1 (6.25) | 1 (16.7) | 0 (0) | 0 (0) |
| - Cilta-cel | 4 (25) | 0 (0) | 0 (0) | 0 (0) |
| **Treatment setting** |  |  |  |  |
| - CT | 7 (43.75) | 3 (50) | 0 (0) | 3 (20) |
| - RW | 9 (56.25) | 3 (50) | 1 (100) | 12 (80) |

**Table S4.** Sensitivity analyses.

|  | **Reported results:** | **Sensitivity analysis 1:** | **Sensitivity analysis 2:** |
| --- | --- | --- | --- |
|  | Fixed effect model including all studies | Random effect model including all studies | Fixed effect model including RWS > 80 pts |
| **Overall NRM** | 7.47 (6.91-8.08) | 6.57 (5.63-7.66) | 7.69 (7.08-8.35) |
| **Entity** |  |  |  |
| - LBCL | 7.03 (6.41-7.7) | 5.94 (4.94-7.12) | 7.32 (6.65-8.05) |
| - IL | 4.49 (2.5-7.92) | 4.44 (2.18-8.85) | 4.49 (2.5-7.92) |
| - MCL | 9.95 (7.29-13.43) | 9.95 (7.29-13.43) | 9.96 (6.92-14.14) |
| - MM | 9.59 (8.03-11.42) | 8.76 (5.32-12.01) | 9.97 (8.22-12.04) |
| **Product** |  |  |  |
| - Axi-cel | 8.87 (7.97-9.85) | 7.75 (6.38-9.38) | 9.12 (8.19-10.15) |
| - Tisa-cel | 4.05 (3.02-5.42) | 4.05 (6.38-9.38) | 4.16 (3.08-5.6) |
| - Liso-cel | 4.03 (2.52-6.38) | 4.24 (2.35-7.54) | 3.6 (2.1-6.1) |
| - Brexu-cel | 9.95 (7.29-13.43) | 9.95 (7.29-13.43) | 9.96 (6.92-14.14) |
| - Ide-cel | 7.61 (5.98-9.64) | 6.81 (4.7-9.77) | 8.33 (6.44-10.72) |
| - Cilta-cel | 14.16 (10.9-18.2) | 14.16 (10.9-18.2) | 13.44 (10.05-14.14) |
| **Treatment setting** |  |  |  |
| - CT | 8.58 (7.43-9.89) | 7.77 (5.71-10.48) | 8.69 (7.45-10.11) |
| - RW | 7.09 (6.46-7.78) | 6.15 (5.21-7.24) | 7.36 (6.67-8.1) |
