# Supplementary material for: Non-relapse mortality after CAR T-cell therapy: A systematic review and meta-analysis of 7,788 lymphoma and myeloma patients
Source: Research Square preprint supplement (doi:10.21203/rs.3.rs-3907430/v1), 2024-02-01
Supplement: Supplementary file 3 [file 65d8345e86c65e79ce0d8a2f.docx]

**Systematic Review and Meta-Analysis Protocol according to PRISMA-P guidelines**From: Shamseer L, Moher D, Clarke M, Ghersi D, Liberati A, Petticrew M, Shekelle P, Stewart L, PRISMA-P Group. Preferred reporting items for systematic review and meta-analysis protocols (PRISMA-P) 2015: elaboration and explanation. BMJ. 2015 Jan 2;349(jan02 1):g7647.

| **Title** | Identification | This report represents a protocol for the systematic review and meta-analysis with the title: Infections drive non-relapse mortality following CAR-T therapy across disease entities and CAR products: a meta-analysis of 7246 patients |
| --- | --- | --- |
|  | Update | Version 2.0 (updated 17.12.2023) |
| **Registration** |  | N/A |
| **Authors** | Contact | David M. Cordas dos Santos1-4, Tobias Tix4,  Kai Rejeski4,5  1 Department of Medical Oncology, Dana-Farber Cancer Institute, Boston, MA, USA  2 Harvard Medical School, Boston, MA, USA  3 Broad Institute of Massachusetts Institute of Technology (MIT) and Harvard, Cambridge, MA, USA  4 Department of Medicine III – Hematology/Oncology, LMU University Hospital, LMU Munich, Munich, Germany  5 Adult BMT and Cellular Therapy Service, Memorial Sloan Kettering Cancer Center, New York, NY, USA  Corresponding Author  PD Dr. Kai Rejeski, MD  Adult BMT and Cellular Therapy Service  Memorial Sloan Kettering Cancer Center  1275 York Avenue, New York, NY 10065, USA  Email: rejeskik@mskcc.org |
|  | Contributions | DMCDS, TT, KR: Conceptualization, Investigation, Methodology, Manuscript Drafting, Editing.  DMCDS, TT: Formal Analysis and Visualization |
| **Amendments** |  | This protocol does not represent an amendment. |
| **Support** | Sources | TT, DMCDS and KR received a fellowship from the School of Oncology of the German Cancer Consortium (DKTK). KR acknowledges funding from the Else Kröner Forschungskolleg (EKFK) within the Munich Clinician Scientist Program (MCSP). This work was supported by a grant within the Gilead Research Scholar Program (to KR) and a grant from the Bruno and Helene Jöster Foundation (to KR). We further acknowledge the structural support from the Bavarian Cancer Research Center (BZKF).  KR further reports following conflicts of interest: Kite/Gilead: Research Funding, Consultancy, Honoraria and travel support; Novartis: Honoraria; BMS/Celgene: Consultancy, Honoraria; Pierre-Fabre: travel support. |
|  | Sponsor | N/A |
|  | Role of sponsor or funder | N/A |
| **Introduction** | Rationale | Chimeric antigen receptor (CAR) T-cells directed against the B-cell antigens CD19 and BCMA represent a practice-changing immunotherapy for multiple advanced B-cell malignancies and are being actively explored for several autoimmune diseases.1-7 However, CAR T-cells present with a unique spectrum of toxicities, which typically include cytokine release syndrome (CRS) and immune effector cell-associated neurotoxicity syndrome (ICANS).8-10 Real-world evidence has further highlighted the role of immune effector cell-associated hematological toxicity (ICAHT), which represents the most common high-grade toxicity within the first year following CAR-T infusion.11-16 Importantly, profound and prolonged neutropenia can compound the risk for severe infections together with B cell aplasia and hypogammaglobulinemia as expected on-target/off-tumor side effects of B-cell targeting CAR-T therapies.17-23 In rare cases, the profound hyperinflammatory response induced by CAR T-cells can result in the development of secondary hemophagocytic lymphohistiocytosis (HLH ).24-26 In patients with long-term disease remission, secondary malignancies, particularly myeloid neoplasms, can occur.27, 28  Taken together, CAR-T-induced side effects can impose a considerable burden on patients with potentially long-lasting sequelae and reduced quality of life.29 To mitigate the risk of severe toxicity, patients often receive immunosuppressive agents and supportive therapies that can be detrimental to therapeutic success.30, 31 Indeed, the presence and/or absence of toxicity can be associated with the risk of treatment failure .32-34 Early non-relapse mortality (NRM), commonly defined as death not preceded by recurrent or progressive malignancy, can be a particularly devastating complication of cell therapy.35 Recent real-world efforts have described both incidence rates and potential causes of NRM following CAR-T therapy.13, 14, 19, 20, 36 However, large-scale analyses of NRM across disease entities, CAR products, and treatment settings have not been performed to date – and data regarding underlying causes remains limited. In this meta-analysis, we want to outline the comparative incidence and causes of NRM across the spectrum of lymphomas and multiple myeloma wherein BCMA- and CD19-directed CAR-T products are currently being utilized. |
|  | Objectives | To determine the non-relapse mortality and causes of death among patients with lymphoma and multiple myeloma treated with CAR-T cells in clinical trials and real-world settings.  Patient/Population:  Adult patients diagnosed with:   - Indolent lymphoma - Large B-cell lymphoma - Mantle cell lymphoma - Multiple myeloma   treated with an approved CAR-T product:   - Tisa-cel - Axi-cel - Liso-cel - Ide-cel - Cilta-cel - Brexu-cel   Comparison:  Comparison of subgroups based on disease entity, CAR-T product including costimulatory domain, line of therapy, treatment setting.  Outcomes:  Non-relapse mortality, number and causes of death. |
| **Methods** | Eligibility criteria | Studies are eligible for the present review when following eligibility criteria are met:  (1) adult cancer patients with either indolent lymphoma (IL), large B-cell lymphoma (LBCL), multiple myeloma (MM) or mantle cell lymphoma (MCL),  (2) use of CAR-T products approved by the Food and Drug Administration (FDA),  (3) data available on NRM and/or causes of death.  All published studies until 15/07/2023 will be included. |
|  | Information sources | The following electronic data bases will be used: Medline, Embase and CINAHL (Cochrane). Study authors will be contacted, if literature is not accessible. |
|  | Search strategy | We will include all randomized phase I-III trials that led to the approval of the specified CAR-T product. In case of publication with longer follow-up times, later reported studies will be use. In addition, we will use the following search strategies to identify real-world studies to be included into the meta-analysis.  **MEDLINE** (via PubMed)  ((((((((((lymphoma[Title/Abstract]) OR myeloma [Title/Abstract]) AND (axicabtagene[Title/Abstract])) OR (standard-of-care CD19 CAR-T[Title/Abstract])) OR (lisocabtagene[Title/Abstract])) OR (idecabtagene[Title/Abstract])) OR (tisagenlecleucel[Title/Abstract])) OR (brexucabtagene[Title/Abstract])) OR (ciltacabtagene[Title/Abstract])) NOT (Review[Publication Type])) NOT (Meta-analysis[Publication Type]) NOT (case reports [Publication Type])  **Embase**  ((myeloma:ab,ti OR lymphoma:ab,ti) AND axicabtagene:ab,ti OR 'standard-of-care cd19 car-t':ab,ti OR lisocabtagene:ab,ti OR idecabtagene:ab,ti OR tisagenlecleucel:ab,ti OR brexucabtagene:ab,ti OR ciltacabtagene:ab,ti) NOT review:it NOT 'meta analysis':it NOT 'case reports':it NOT medline NOT 'conference abstract'/it  **CIINAHL** in the Cochrane Library  ((myeloma):ti,ab,kw OR (lymphoma):ti,ab,kw) AND ((axicabtagene):ti,ab,kw OR ("standard-of-care cd19 car-t"):ti,ab,kw OR (lisocabtagene):ti,ab,kw OR (idecabtagene):ti,ab,kw OR (tisagenlecleucel):ti,ab,kw OR (brexucabtagene):ti,ab,kw OR (ciltacabtagene):ti,ab,kw) in Trials |
|  | Study records:   - Data management - Selection process - Data collection process | From all studies fulfilling eligibility criteria, two authors (DMCDS and TT) will separately extract the data and countercheck each other. Discrepancies will be solved by consultation with senior authors (KR). Search records will be saved and managed using EndNote. |
|  | Data items | Data items will include date of publication, number of patients, entities, CAR-T product specifications, follow-up time, number and causes of death, and NRM rates if reported. If more than one CAR-T product was used in a single study, the reported data will be assigned to separate cohorts and evaluated accordingly.  In addition, we will classify and create subgroups for causes of death: infection, malignancy, CRS, ICANS/neurotoxicity, cardiovascular/respiratory, hemorrhage, HLH, organ failure not otherwise specified (NOS), others, or unknown. |
|  | Outcomes and prioritization | For the planned analysis of NRM proportions, NRM cumulative incidence rates with will be extracted if reported. In case of missing NRM reports, we will calculate NRM point estimates based on the extracted cohort sizes and numbers of deaths, and calculate 95% CI using the Wilson method.  There is no prioritization. |
|  | Risk of bias in individual studies | Study bias of individual studies will be assessed by using the Joanna Brigg’s Institute critical appraisal tool. |
|  | Data synthesis | Studies reporting on the same disease entities, CAR-T products, treatment settings and lines of therapy will be synthesized based on reported and calculated NRM rates as well as number and causes of death and analyzed in subgroups.  Common effect models will be used to summarize measures and forest plots will be generated for illustration. Heterogeneity will be assessed by the Q statistic and quantified using I². |
|  | Meta-bias(es) | Funnel plots will be created to test for publication bias including subgroup analyses. |
|  | Sensitivity Analyses | Following sensitivity analyses will be performed:   - Comparison of fixed effect models and random effect models - Comparison of inclusion of all studies vs study size filter for RWS with cut-off at 80 patients |
|  | Certainty of a body of evidence assessment | This meta-analysis will not focus on the comparison between different interventions. Due to missing control arms, the GRADE approach for evaluating the body of evidence is of limited use. |

**References**

1. Locke FL, Miklos DB, Jacobson CA, et al. Axicabtagene Ciloleucel as Second-Line Therapy for Large B-Cell Lymphoma. N Engl J Med 2022;386:640-654.

2. Schett G, Mackensen A, Mougiakakos D. CAR T-cell therapy in autoimmune diseases. Lancet 2023.

3. Shah BD, Ghobadi A, Oluwole OO, et al. KTE-X19 for relapsed or refractory adult B-cell acute lymphoblastic leukaemia: phase 2 results of the single-arm, open-label, multicentre ZUMA-3 study. Lancet 2021;398:491-502.

4. Locke FL, Ghobadi A, Jacobson CA, et al. Long-term safety and activity of axicabtagene ciloleucel in refractory large B-cell lymphoma (ZUMA-1): a single-arm, multicentre, phase 1-2 trial. Lancet Oncol 2019;20:31-42.

5. Schuster SJ, Bishop MR, Tam CS, et al. Tisagenlecleucel in Adult Relapsed or Refractory Diffuse Large B-Cell Lymphoma. N Engl J Med 2019;380:45-56.

6. Wang M, Munoz J, Goy A, et al. KTE-X19 CAR T-Cell Therapy in Relapsed or Refractory Mantle-Cell Lymphoma. N Engl J Med 2020;382:1331-1342.

7. Iacoboni G, Rejeski K, Villacampa G, et al. Real-world evidence of brexucabtagene autoleucel for the treatment of relapsed or refractory mantle cell lymphoma. Blood Adv 2022.

8. Shimabukuro-Vornhagen A, Godel P, Subklewe M, et al. Cytokine release syndrome. J Immunother Cancer 2018;6:56.

9. Karschnia P, Jordan JT, Forst DA, et al. Clinical presentation, management, and biomarkers of neurotoxicity after adoptive immunotherapy with CAR T cells. Blood 2019;133:2212-2221.

10. Karschnia P, Miller KC, Yee AJ, et al. Neurologic toxicities following adoptive immunotherapy with BCMA-directed CAR T-cells. Blood 2023.

11. Wudhikarn K, Pennisi M, Garcia-Recio M, et al. DLBCL patients treated with CD19 CAR T cells experience a high burden of organ toxicities but low nonrelapse mortality. Blood Adv 2020;4:3024-3033.

12. Rejeski K, Perez Perez A, Sesques P, et al. CAR-HEMATOTOX: A model for CAR T-cell related hematological toxicity in relapsed/refractory large B-cell lymphoma. Blood 2021.

13. Rejeski K, Hansen DK, Bansal R, et al. The CAR-HEMATOTOX score as a prognostic model of toxicity and response in patients receiving BCMA-directed CAR-T for relapsed/refractory multiple myeloma. J Hematol Oncol 2023;16:88.

14. Rejeski K, Wang Y, Albanyan O, et al. The CAR-HEMATOTOX score identifies patients at high risk for hematological toxicity, infectious complications, and poor treatment outcomes following brexucabtagene autoleucel for relapsed or refractory MCL. Am J Hematol 2023.

15. Jain T, Knezevic A, Pennisi M, et al. Hematopoietic recovery in patients receiving chimeric antigen receptor T-cell therapy for hematologic malignancies. Blood Adv 2020;4:3776-3787.

16. Jain T, Olson TS, Locke FL. How I Treat Cytopenias after CAR T-cell Therapy. Blood 2023.

17. Hill JA, Li D, Hay KA, et al. Infectious complications of CD19-targeted chimeric antigen receptor-modified T-cell immunotherapy. Blood 2018;131:121-130.

18. Rejeski K, Kunz WG, Rudelius M, et al. Severe Candida glabrata pancolitis and fatal Aspergillus fumigatus pulmonary infection in the setting of bone marrow aplasia after CD19-directed CAR T-cell therapy - a case report. BMC Infect Dis 2021;21:121.

19. Rejeski K, Perez A, Iacoboni G, et al. The CAR-HEMATOTOX risk-stratifies patients for severe infections and disease progression after CD19 CAR-T in R/R LBCL. J Immunother Cancer 2022;10.

20. Nastoupil LJ, Jain MD, Feng L, et al. Standard-of-Care Axicabtagene Ciloleucel for Relapsed or Refractory Large B-Cell Lymphoma: Results From the US Lymphoma CAR T Consortium. J Clin Oncol 2020;38:3119-3128.

21. Bethge WA, Martus P, Schmitt M, et al. GLA/DRST real-world outcome analysis of CAR-T cell therapies for large B-cell lymphoma in Germany. Blood 2022.

22. Kampouri E, Little JS, Rejeski K, Manuel O, Hammond SP, Hill JA. Infections after chimeric antigen receptor (CAR)-T-cell therapy for hematologic malignancies. Transpl Infect Dis 2023:e14157.

23. Gudiol C, Lewis RE, Strati P, Kontoyiannis DP. Chimeric antigen receptor T-cell therapy for the treatment of lymphoid malignancies: is there an excess risk for infection? Lancet Haematol 2021;8:e216-e228.

24. Major A, Collins J, Craney C, et al. Management of hemophagocytic lymphohistiocytosis (HLH) associated with chimeric antigen receptor T-cell (CAR-T) therapy using anti-cytokine therapy: an illustrative case and review of the literature. Leuk Lymphoma 2021;62:1765-1769.

25. Lichtenstein DA, Schischlik F, Shao L, et al. Characterization of HLH-like manifestations as a CRS variant in patients receiving CD22 CAR T cells. Blood 2021;138:2469-2484.

26. Hines MR, Knight TE, McNerney KO, et al. Immune Effector Cell associated Hemophagocytic Lymphohistiocytosis-like Syndrome (IEC-HS). Transplant Cell Ther 2023.

27. Cordeiro A, Bezerra ED, Hirayama AV, et al. Late Events after Treatment with CD19-Targeted Chimeric Antigen Receptor Modified T Cells. Biol Blood Marrow Transplant 2020;26:26-33.

28. Zhao A, Zhao M, Qian W, Liang A, Li P, Liu H. Secondary myeloid neoplasms after CD19 CAR T therapy in patients with refractory/relapsed B-cell lymphoma: Case series and review of literature. Front Immunol 2022;13:1063986.

29. Chakraborty R, Hill BT, Majeed A, Majhail NS. Late Effects after Chimeric Antigen Receptor T cell Therapy for Lymphoid Malignancies. Transplant Cell Ther 2021;27:222-229.

30. Strati P, Ahmed S, Furqan F, et al. Prognostic impact of corticosteroids on efficacy of chimeric antigen receptor T-cell therapy in large B-cell lymphoma. Blood 2021;137:3272-3276.

31. Smith M, Dai A, Ghilardi G, et al. Gut microbiome correlates of response and toxicity following anti-CD19 CAR T cell therapy. Nat Med 2022;28:713-723.

32. Rejeski K, Perez A, Iacoboni G, et al. Severe hematotoxicity after CD19 CAR-T therapy is associated with suppressive immune dysregulation and limited CAR-T expansion. Sci Adv 2023;9:eadg3919.

33. Jacobs MT, Jain MD, Gao F, et al. Severity of Cytokine Release Syndrome Influences Outcome After Axicabtagene Ciloleucel for Large B cell Lymphoma: Results from the US Lymphoma CAR-T Consortium. Clin Lymphoma Myeloma Leuk 2022;22:753-759.

34. Brammer JE, Braunstein Z, Katapadi A, et al. Early toxicity and clinical outcomes after chimeric antigen receptor T-cell (CAR-T) therapy for lymphoma. J Immunother Cancer 2021;9.

35. McDonald GB, Sandmaier BM, Mielcarek M, et al. Survival, Nonrelapse Mortality, and Relapse-Related Mortality After Allogeneic Hematopoietic Cell Transplantation: Comparing 2003-2007 Versus 2013-2017 Cohorts. Ann Intern Med 2020;172:229-239.

36. Lemoine J, Bachy E, Cartron G, et al. Non-Relapse Mortality after CAR T-Cell therapy for Large B-Cell Lymphoma: A LYSA Study from the DESCAR-T Registry. Blood Adv 2023.
